# Supplementary material for: Above the Invasive and Ornamental Attributes of the Traveler’s Palm: An In Vitro and In Silico Insight into the Anti-Oxidant, Anti-Enzymatic, Cytotoxic and Phytochemical Characterization of Ravenala madagascariensis
Source: MDPI journal article supplement (doi:10.3390/antiox12010184), 2023-01-12
Supplement: s1 [file s1]

## Supplementary Information

# Above the Invasive and Ornamental Attributes of the Traveler's Palm: An In Vitro and In Silico Insight into the Anti-Oxidant, Anti-Enzymatic, Cytotoxic and Phytochemical Characterization of *Ravenala madagascariensis*

Shanoo Suroowan <sup>1</sup>, Eulogio Jose Llorent-Martínez <sup>2</sup>, Gokhan Zengin <sup>3</sup>, Stefano Dall'Acqua <sup>4,\*</sup>, Stefania Sut <sup>4</sup>, Kalaivani Buskaran <sup>5</sup>, Sharida Fakurazi <sup>5,6</sup>, Bao Le Van <sup>7,8,\*</sup>, Mohnad Abdalla <sup>9</sup>, Ashraf N. Abdalla <sup>10</sup>, Asaad Khalid <sup>11,12</sup> and Mohamad Fawzi Mahomoodally <sup>1,13,14</sup>

<sup>1</sup> Department of Health Sciences, Faculty of Medicine and Health Sciences, University of Mauritius, Réduit 80837, Mauritius; shanoo.suroowan1@umail.uom.ac.mu (S.S.); f.mahomoodally@uom.ac.mu (M.F.M.)

<sup>2</sup> Department of Physical and Analytical Chemistry, University of Jaén, Campus Las Lagunillas S/N, E-23071 Jaén, Spain; ellorent@ujaen.es

<sup>3</sup> Department of Biology, Science Faculty, Selcuk University, Konya 42130, Turkey; gokhanzengin@selcuk.edu.tr

<sup>4</sup> Department of Pharmaceutical and Pharmacological Sciences, University of Padova, Via Marzolo 5, 35131 Padova, Italy; stefania.sut@unipd.it

<sup>5</sup> Laboratory of Natural Medicine and Product Research, Institute of Bioscience, Universiti Putra Malaysia, Serdang 43400, Selangor Darul Ehsan, Malaysia; vaneey\_88@yahoo.com (K.B.); sharida@upm.edu.my (S.F.)

<sup>6</sup> Department of Human Anatomy, Faculty of Medicine and Health Sciences, Universiti Putra Malaysia, Serdang 43400, Selangor Darul Ehsan, Malaysia

<sup>7</sup> Institute of Research and Development, Duy Tan University, Da Nang 550000, Vietnam

<sup>8</sup> Faculty of Natural Sciences, Duy Tan University, Da Nang 550000, Vietnam

<sup>9</sup> Pediatric Research Institute, Children's Hospital Affiliated to Shandong University, Jinan 250022, China; mohnadabdalla200@gmail.com

<sup>10</sup> Department of Pharmacology and Toxicology, College of Pharmacy, Umm Al-Qura University, Makkah 21955, Saudi Arabia; anabdrabo@uqu.edu.sa

<sup>11</sup> Substance Abuse and Toxicology Research Center, Jazan University, P.O. Box 114, Jazan 45142, Saudi Arabia; akahmed@jazanu.edu.sa

<sup>12</sup> Medicinal and Aromatic Plants and Traditional Medicine Research Institute, National Center for Research, Khartoum P.O. Box 2404, Sudan

<sup>13</sup> Center for Transdisciplinary Research, Department of Pharmacology, Saveetha Dental College, Saveetha Institute of Medical and Technical Science, Chennai 600077, India

<sup>14</sup> Centre of Excellence for Pharmaceutical Sciences, North-West University, Private Bag X6001, Potchefstroom 2520, South Africa

\* Correspondence: stefano.dallacqua@unipd.it (S.D.); vnble@duytan.edu.vn (B.L.V.)

### **Analysis of phenolic compounds by HPLC-ESI-Q-TOF-MS-MS**

For the analysis of compounds, 5 mg of DE were dissolved in 1 mL MeOH or 1 mL 10% MeOH (aqueous extract), filtered through 0.45  $\mu\text{m}$  filters, and 4  $\mu\text{L}$  was injected in the HPLC system. Analyses were performed in an Agilent 1200 (Agilent Technologies, Santa Clara, CA, USA) equipped with an Agilent 6530B quadrupole-time-of-flight mass spectrometer (Q-TOF MS). The column used was a Luna Omega Polar C18 of 150 x 3.0 mm and 5  $\mu\text{m}$  particle size with a Polar C18 Security Guard cartridge (4 x 3.0 mm), both purchased from Phenomenex (Phenomenex, Torrance, CA, USA). The separation was performed at ambient temperature with a gradient elution program at a flow rate of 0.4 mL min<sup>-1</sup>. The mobile phases consisted of water + formic acid 0.1 % v/v (eluent A) and acetonitrile (eluent B). The gradient elution was: 10-25% B in 0-25 min, 25% B in 25-30 min, 25-50% B in 30-40 min, 50-100% B in 40-42 min, 100% in 42-47 min. Then, eluent B was returned to 10% with a 7 min stabilization time.

To obtain the MS and MS/MS spectra, the mass spectrometer was operated in the negative ion mode using an orthogonal ESI source (Agilent Dual ESI, Santa Clara, CA, USA). The parameters used were: capillary voltage, 3500 V; nebulizer pressure of 45 psi; drying gas flow rate, 10 L/min; gas temperature, 325 °C; skimmer voltage, 60 V; fragmentor voltage, 140 V. Continuous internal calibration was performed during analyses with the use of signals at  $m/z$  112.9855 and 1033.9881. The MS and Auto MS/MS modes (using collision energies of 10, 20 and 40 V) were set to acquire  $m/z$  values ranging between 50-1200, at a scan rate of 2 and 3 spectra per second, respectively. Agilent Mass Hunter Qualitative analysis software version B.06.00 was used for post-acquisition data processing.

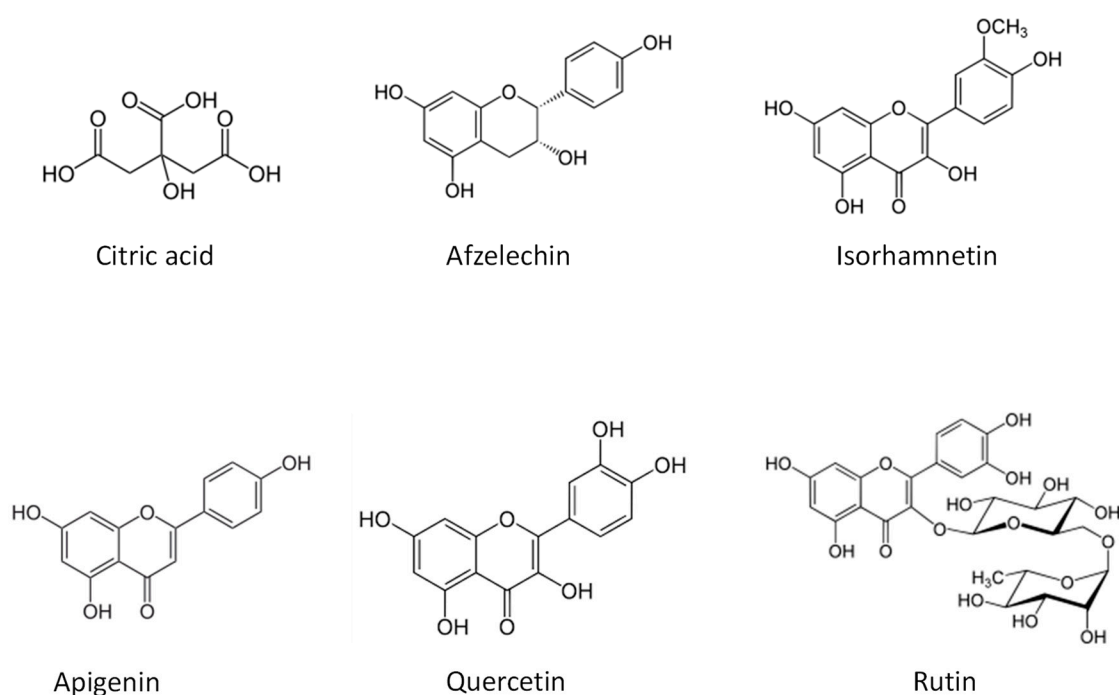

**Figure S1:** Chemical structures of the main compounds found in the analyzed extracts

**Table S1:** Chemical structures of compounds used for docking studies

| Compound              | IUPAC Name                                                                   | Pubchem database link                                                                                      | PubChem CID |
|-----------------------|------------------------------------------------------------------------------|------------------------------------------------------------------------------------------------------------|-------------|
| (Epi)afzelechin       | 2-(4-Hydroxyphenyl)-3,4-dihydro-2H-1-benzopyran-3,5,7-triol                  | <a href="#">2-(4-Hydroxyphenyl)-3,4-dihydro-2H-1-benzopyran-3,5,7-triol   C15H14O5 - PubChem (nih.gov)</a> | 282014      |
| 2-Isopropylmalic acid | 2-hydroxy-2-propan-2-ylbutanedioic acid                                      | <a href="#">2-Isopropylmalic acid   C7H12O5 - PubChem (nih.gov)</a>                                        | 77          |
| Citric acid           | 2-hydroxypropane-1,2,3-tricarboxylic acid                                    | <a href="#">Citric Acid   C6H8O7 - PubChem (nih.gov)</a>                                                   | 311         |
| Coutaric acid         | (2R,3R)-2-hydroxy-3-[(E)-3-(4-hydroxyphenyl)prop-2-enoyl]oxybutanedioic acid | <a href="#">Coutaric acid   C13H12O8 - PubChem (nih.gov)</a>                                               | 57517924    |
| Epicatechin           | (2R,3R)-2-(3,4-dihydroxyphenyl)-3,4-dihydro-2H-chromene-3,5,7-triol          | <a href="#">(-)-Epicatechin   C15H14O6 - PubChem (nih.gov)</a>                                             | 72276       |

|                         |                                                                                                                                                                             |                                                                         |           |
|-------------------------|-----------------------------------------------------------------------------------------------------------------------------------------------------------------------------|-------------------------------------------------------------------------|-----------|
| Ferulic acid            | (E)-3-(4-hydroxy-3-methoxyphenyl)prop-2-enoic acid                                                                                                                          | <a href="#">Ferulic acid   C10H10O4 - PubChem (nih.gov)</a>             | 445858    |
| Gallic acid             | 3,4,5-trihydroxybenzoic acid                                                                                                                                                | <a href="#">Gallic Acid   C7H6O5 - PubChem (nih.gov)</a>                | 370       |
| Isocitric acid          | 1-hydroxypropane-1,2,3-tricarboxylic acid                                                                                                                                   | <a href="#">Isocitric acid   C6H8O7 - PubChem (nih.gov)</a>             | 1198      |
| Isorhamnetin Rutinoside | 5,7-dihydroxy-2-(4-hydroxy-3-methoxyphenyl)-3-[(2S,3R,4S,5S)-3,4,5-trihydroxy-6-[[[(2R,3R,4R,5R,6S)-3,4,5-trihydroxy-6-methyloxan-2-yl]oxymethyl]oxan-2-yl]oxychromen-4-one | <a href="#">Isorhamnetin rutinoside   C28H32O16 - PubChem (nih.gov)</a> | 133562525 |
| Kiwiionoside            | 2-[3,4-dihydroxy-4-[(E)-3-hydroxybut-1-enyl]-3,5,5-trimethylcyclohexyl]oxy-6-(hydroxymethyl)oxane-3,4,5-triol                                                               | <a href="#">Kiwiionoside   C19H34O9 - PubChem (nih.gov)</a>             | 131752431 |
| N-Feruloyltyramine      | (E)-3-(4-hydroxy-3-methoxyphenyl)-N-[2-(4-hydroxyphenyl)ethyl]prop-2-enamide                                                                                                | <a href="#">Moupinamide   C18H19NO4 - PubChem (nih.gov)</a>             | 5280537   |
| Phlorizin               | 1-[2,4-dihydroxy-6-[(2S,3R,4S,5S,6R)-3,4,5-trihydroxy-6-(hydroxymethyl)oxan-2-yl]oxyphenyl]-3-(4-hydroxyphenyl)propan-1-one                                                 | <a href="#">Phlorizin   C21H24O10 - PubChem (nih.gov)</a>               | 6072      |
| Quercetin               | 2-(3,4-dihydroxyphenyl)-3,5,7-trihydroxychromen-4-one                                                                                                                       | <a href="#">Quercetin   C15H10O7 - PubChem (nih.gov)</a>                | 5280343   |
| Roseoside               | (4S)-4-hydroxy-3,5,5-trimethyl-4-[(E,3R)-3-[(2R,3R,4S,5S,6R)-3,4,5-trihydroxy-6-(hydroxymethyl)oxan-2-yl]oxybut-1-enyl]cyclohex-2-en-1-one                                  | <a href="#">Roseoside   C19H30O8 - PubChem (nih.gov)</a>                | 9930064   |
| Rutin                   | 2-(3,4-dihydroxyphenyl)-5,7-dihydroxy-3-[(2S,3R,4S,5S,6R)-3,4,5-trihydroxy-6-[[[(2R,3R,4R,5R,6S)-3,4,5-trihydroxy-6-methyloxan-2-yl]oxymethyl]oxan-2-yl]oxychromen-4-one    | <a href="#">Rutin   C27H30O16 - PubChem (nih.gov)</a>                   | 5280805   |
| Salicylic acid          | 2-hydroxybenzoic acid                                                                                                                                                       | <a href="#">Salicylic Acid   HOC6H4COOH - PubChem (nih.gov)</a>         | 338       |
